# Supplementary material for: Epigenetic Aging Signatures Are Coherently Modified in Cancer
Source: PubMed Central journal article supplement (PMC4482318; doi:10.1371/journal.pgen.1005334), 2015-06-25
Supplement: pgen.1005334.s008.pdf [file pgen.1005334.s008.pdf]

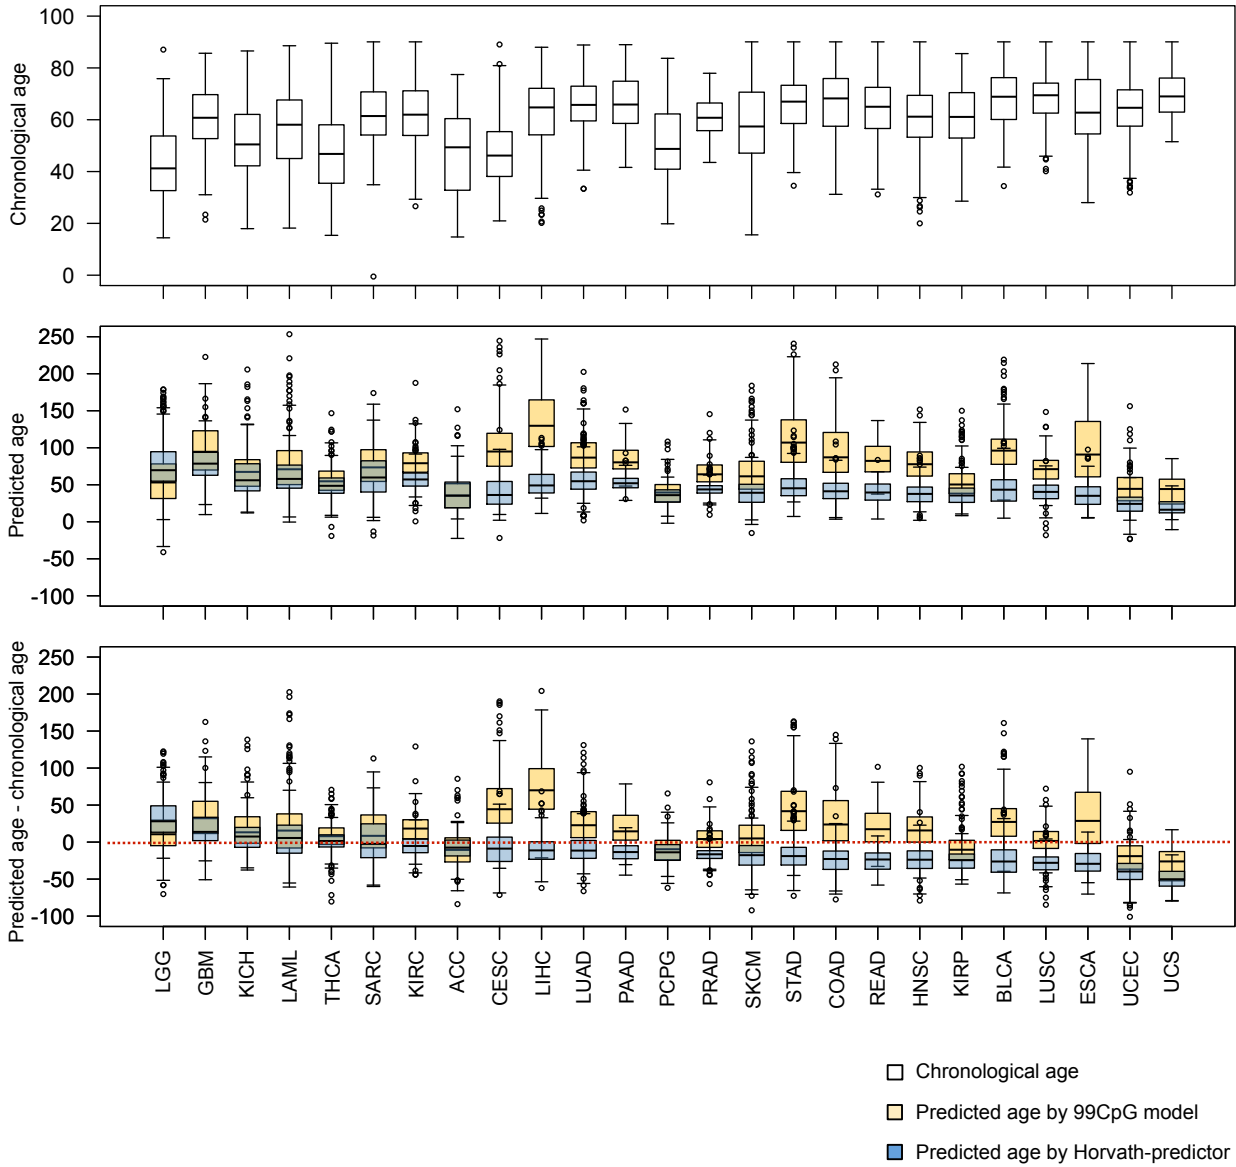

**S8 Fig. Deviation of epigenetic age-predictions in various types of cancer.**

Box-plots demonstrate the distribution of chronological age, predicted age (99-CpG model in yellow; Horvath-predictor in blue), and the deviation of predicted and chronological age across the different cancer types of TCGA.
