# Supplementary material for: Epigenetic Aging Signatures Are Coherently Modified in Cancer
Source: PubMed Central journal article supplement (PMC4482318; doi:10.1371/journal.pgen.1005334), 2015-06-25
Supplement: pgen.1005334.s011.pdf [file pgen.1005334.s011.pdf]

**S1 Table. Clinical information about AML patients (TCGA).**

| <b>Parameter</b>                            | <b>Value</b> |
|---------------------------------------------|--------------|
| Age - year                                  | 55.0±16.0    |
| Male sex - no. (%)                          | 105 (54.1)   |
| Bone marrow blasts - %                      | 69.6±19.0    |
| <b>Cytogenetic risk group - no. (%)</b>     |              |
| Favorable                                   | 35 (18)      |
| Intermediate                                | 112 (58)     |
| Non-favorable                               | 43 (22)      |
| Missing data                                | 4 (2)        |
| <b>AML FAB subtype — no. (%)</b>            |              |
| AML with minimal maturation: M0             | 19 (10)      |
| AML without maturation: M1                  | 44 (23)      |
| AML with maturation: M2                     | 42 (21)      |
| Acute promyelocytic leukemia: M3            | 18 (9)       |
| Acute myelomonocytic leukemia: M4           | 41 (21)      |
| Acute monoblastic or monocytic leukemia: M5 | 22 (11)      |
| Acute erythroid leukemia: M6                | 3 (2)        |
| Acute megakaryoblastic leukemia: M7         | 3 (2)        |
| Other subtype                               | 2 (1)        |
