# Supplementary material for: Epigenetic Aging Signatures Are Coherently Modified in Cancer
Source: PubMed Central journal article supplement (PMC4482318; doi:10.1371/journal.pgen.1005334), 2015-06-25
Supplement: pgen.1005334.s012.pdf [file pgen.1005334.s012.pdf]

**S2 Table. Differentially expressed genes in AML samples predicted young vs. old.**

| <b>Gene Symbol</b> | <b>Gene Name</b>                                    | <b>Gene ID</b> | <b>log2 fold change<br/>(below mean -<br/>above mean)</b> | <b>adjusted<br/>p-value</b> |
|--------------------|-----------------------------------------------------|----------------|-----------------------------------------------------------|-----------------------------|
| FAM127B            | family with sequence similarity 127, member B       | 26071          | -1.50                                                     | 0.003                       |
| C7orf13            | chromosome 7 open reading frame 13                  | 129790         | -1.28                                                     | 0.011                       |
| FAM127A            | family with sequence similarity 127, member A       | 8933           | -1.93                                                     | 0.011                       |
| NHLRC1             | NHL repeat containing E3 ubiquitin protein ligase 1 | 378884         | -1.02                                                     | 0.013                       |
| LOC644538          | small integral membrane protein 10                  | 644538         | -1.36                                                     | 0.013                       |
| TEKT2              | tektin 2 (testicular)                               | 27285          | -1.20                                                     | 0.026                       |
| CLU                | clusterin                                           | 1191           | -1.56                                                     | 0.035                       |
| JAG1               | jagged 1                                            | 182            | -1.25                                                     | 0.044                       |
| DSC2               | desmocollin 2                                       | 1824           | -2.22                                                     | 0.044                       |
| TTC12              | tetratricopeptide repeat domain 12                  | 54970          | -1.13                                                     | 0.046                       |
| NEXN               | nexilin (F actin binding protein)                   | 91624          | 1.04                                                      | 0.049                       |
