# Supplementary material for: Epigenetic Aging Signatures Are Coherently Modified in Cancer
Source: PubMed Central journal article supplement (PMC4482318; doi:10.1371/journal.pgen.1005334), 2015-06-25
Supplement: pgen.1005334.s013.pdf [file pgen.1005334.s013.pdf]

**S3 Table. Epigenetic age-predictions of AML samples with specific somatic mutations.**

| UID  | Chronological age | Predicted age (99 CpG model) | Predicted age (Horvath predictor) | IDH2    | Type     |
|------|-------------------|------------------------------|-----------------------------------|---------|----------|
| 2966 | 57                | 177.35                       | 253.35                            | p.R140Q | missense |
| 2948 | 67                | 176.92                       | 136.32                            | p.R140Q | missense |
| 2805 | 77                | 152.49                       | 87.48                             | p.R140Q | missense |
| 2826 | 64                | 143.04                       | 72.74                             | p.R140Q | missense |
| 2807 | 68                | 130.80                       | 163.22                            | p.R140Q | missense |
| 2866 | 67                | 122.25                       | 126.34                            | p.R140Q | missense |
| 2891 | 42                | 121.45                       | 112.24                            | p.R140Q | missense |
| 2959 | 71                | 118.62                       | 95.95                             | p.R140Q | missense |
| 3002 | 68                | 115.63                       | 116.48                            | p.R140L | missense |
| 2934 | 65                | 110.18                       | 127.10                            | p.R140Q | missense |
| 2907 | 69                | 101.14                       | 90.58                             | p.R140Q | missense |
| 2898 | 69                | 95.96                        | 51.73                             | p.R172K | missense |
| 2877 | 60                | 81.77                        | 70.72                             | p.R140Q | missense |
| 2936 | 60                | 75.42                        | 69.87                             | p.R140Q | missense |
| 2874 | 59                | 74.17                        | 63.67                             | p.R140Q | missense |
| 2810 | 76                | 63.23                        | 44.57                             | p.R140Q | missense |
| 2821 | 64                | 42.61                        | 25.91                             | p.R172K | missense |
| 2973 | 67                | 36.39                        | 28.51                             | p.R140Q | missense |

  

| UID  | Chronological age | Predicted age (99 CpG model) | Predicted age (Horvath predictor) | RUNX1               | Type                     |
|------|-------------------|------------------------------|-----------------------------------|---------------------|--------------------------|
| 3009 | 23                | 195.94                       | 197.70                            | p.G164fs            | frame_shift_ins          |
| 2933 | 58                | 189.27                       | 89.65                             | p.R162G             | missense                 |
| 2805 | 77                | 152.49                       | 87.48                             | p.R201*,p.A142fs    | nonsense,frame_shift_ins |
| 2983 | 45                | 148.61                       | 60.93                             | p.A149P             | missense                 |
| 2912 | 63                | 147.14                       | 99.24                             | p.R162K             | missense                 |
| 2807 | 68                | 130.80                       | 163.22                            | p.SG167in_frame_del | in_frame_del             |
| 2959 | 71                | 118.62                       | 95.95                             | p.R201Q             | missense                 |
| 2970 | 34                | 110.47                       | 58.72                             | p.P113L             | missense                 |
| 2907 | 69                | 101.14                       | 90.58                             | e5-2                | splice_site              |
| 2899 | 76                | 96.86                        | 77.00                             | p.R162G             | missense                 |
| 2854 | 51                | 90.42                        | 71.61                             | outofframe_fusion   | outofframe_fusion        |
| 2978 | 61                | 84.31                        | 92.15                             | p.R201*             | nonsense                 |
| 2949 | 58                | 84.07                        | 79.74                             | p.S314fs            | frame_shift_ins          |
| 2890 | 69                | 77.00                        | 49.89                             | p.R201*             | nonsense                 |
| 2936 | 60                | 75.42                        | 69.87                             | p.R320*             | nonsense                 |
| 2927 | 88                | 71.52                        | 74.17                             | p.R201*,p.R162S     | nonsense,missense        |
| 2821 | 64                | 42.61                        | 25.91                             | p.D123fs            | frame_shift_ins          |

| UID  | Chronological age | Predicted age (99 CpG model) | Predicted age (Horvath predictor) | TET2              | Type                            |
|------|-------------------|------------------------------|-----------------------------------|-------------------|---------------------------------|
| 2845 | 37                | 107.68                       | 45.80                             | p.K110fs          | frame_shift_del                 |
| 2978 | 61                | 84.31                        | 92.15                             | e3+2,p.R318*      | splice_site_ins,nonsense        |
| 3006 | 61                | 80.72                        | 45.08                             | p.R254*           | nonsense                        |
| 2879 | 68                | 68.37                        | 32.17                             | p.R18*,p.N275fs   | nonsense,frame_shift_del        |
| 2923 | 78                | 64.13                        | 44.65                             | p.R550*,p.Q958fs  | nonsense,frame_shift_ins        |
| 2971 | 76                | 51.89                        | 35.13                             | p.A1071fs,p.A665D | frame_shift_del,missense        |
| 2873 | 51                | 49.49                        | 45.80                             | p.H880fs          | frame_shift_del                 |
| 2928 | 43                | 46.25                        | 93.73                             | p.P1115fs,p.E154V | frame_shift_del,missense        |
| 2830 | 64                | 39.67                        | 59.52                             | p.A183fs,p.K241fs | frame_shift_ins,frame_shift_del |
| 2822 | 65                | 38.28                        | 76.56                             | p.Q317fs          | frame_shift_del                 |
| 2996 | 75                | 30.73                        | 64.97                             | p.R156fs,p.H670Y  | frame_shift_del,missense        |
| 2964 | 57                | 29.59                        | 47.37                             | p.Q916*,p.P691L   | nonsense,missense               |
| 2908 | 81                | 25.92                        | 49.07                             | p.R18*            | nonsense                        |
| 2937 | 35                | 10.90                        | 20.02                             | p.F125fs          | frame_shift_del                 |
| 2876 | 45                | 5.18                         | 30.64                             | p.Q481*,p.H672fs  | nonsense,frame_shift_del        |
| 2965 | 60                | 0.00                         | 41.71                             | p.P118fs          | frame_shift_del                 |

| UID  | Chronological age | Predicted age (99 CpG model) | Predicted age (Horvath predictor) | TP53             | Type                     |
|------|-------------------|------------------------------|-----------------------------------|------------------|--------------------------|
| 2861 | 76                | 124.95                       | 99.15                             | p.M39fs          | frame_shift_ins          |
| 2938 | 76                | 105.80                       | 81.36                             | p.R342fs,p.H179R | frame_shift_del,missense |
| 2868 | 77                | 91.96                        | 56.47                             | e4-1             | splice_site              |
| 2904 | 65                | 86.46                        | 77.61                             | p.R337C          | missense                 |
| 2885 | 71                | 70.96                        | 35.02                             | p.H193Y          | missense                 |
| 2820 | 76                | 70.29                        | 67.33                             | p.P223fs         | frame_shift_ins          |
| 2857 | 54                | 64.50                        | 52.73                             | e0+1             | splice_site              |
| 2838 | 67                | 61.80                        | 68.46                             | p.T125           | silent                   |
| 2952 | 60                | 57.64                        | 66.94                             | p.E286G          | missense                 |
| 2829 | 50                | 57.31                        | 59.29                             | p.R280G,e6-1     | missense,splice_site     |
| 2878 | 47                | 56.87                        | 36.54                             | p.S215G,p.V173fs | missense,frame_shift_del |
| 2935 | 66                | 52.49                        | 51.31                             | p.R248Q          | missense                 |
| 2941 | 73                | 49.62                        | 53.52                             | p.I195S          | missense                 |
| 2943 | 70                | 33.31                        | 54.01                             | p.R273C          | missense                 |
| 2813 | 78                | 32.77                        | 55.37                             | p.C176Y          | missense                 |
| 2908 | 81                | 25.92                        | 49.07                             | p.Q317*,p.C141W  | nonsense,missense        |

| UID  | Chronological age | Predicted age (99 CpG model) | Predicted age (Horvath predictor) | WT1               | Type                            |
|------|-------------------|------------------------------|-----------------------------------|-------------------|---------------------------------|
| 3009 | 23                | 195.94                       | 197.70                            | p.A382fs          | frame_shift_ins                 |
| 2839 | 51                | 152.08                       | 107.56                            | p.A381fs          | frame_shift_ins                 |
| 2913 | 61                | 136.84                       | 158.58                            | e7+1              | splice_site                     |
| 2989 | 29                | 135.89                       | 84.41                             | p.Y402fs          | frame_shift_del                 |
| 2844 | 63                | 111.48                       | 44.32                             | p.S381fs          | frame_shift_ins                 |
| 2970 | 34                | 110.47                       | 58.72                             | e9-1              | splice_site                     |
| 2930 | 62                | 96.10                        | 58.71                             | p.V370fs,p.R370fs | frame_shift_ins,frame_shift_ins |
| 2976 | 53                | 89.62                        | 91.20                             | p.A382fs          | frame_shift_ins                 |
| 2919 | 54                | 84.94                        | 55.21                             | p.H465Y           | missense                        |
| 2846 | 57                | 84.36                        | 57.86                             | p.A382fs          | frame_shift_ins                 |
| 2874 | 59                | 74.17                        | 63.67                             | p.R462W           | missense                        |

| UID  | Chronological age | Predicted age (99 CpG model) | Predicted age (Horvath predictor) | PML-RARA | Type        |
|------|-------------------|------------------------------|-----------------------------------|----------|-------------|
| 3007 | 35                | 75.54                        | 44.08                             | PML-RARA | gene fusion |
| 3001 | 31                | 74.77                        | 71.66                             | PML-RARA | gene fusion |
| 3012 | 53                | 70.37                        | 62.22                             | PML-RARA | gene fusion |
| 2991 | 40                | 67.67                        | 56.67                             | PML-RARA | gene fusion |
| 2998 | 68                | 65.69                        | 61.15                             | PML-RARA | gene fusion |
| 2999 | 62                | 64.48                        | 46.63                             | PML-RARA | gene fusion |
| 2982 | 29                | 55.79                        | 52.50                             | PML-RARA | gene fusion |
| 2872 | 42                | 47.99                        | 60.65                             | PML-RARA | gene fusion |
| 2863 | 63                | 45.42                        | 32.91                             | PML-RARA | gene fusion |
| 2980 | 50                | 44.69                        | 44.05                             | PML-RARA | gene fusion |
| 2840 | 74                | 41.14                        | 55.93                             | PML-RARA | gene fusion |
| 2823 | 61                | 40.87                        | 62.53                             | PML-RARA | gene fusion |
| 2803 | 61                | 39.54                        | 42.83                             | PML-RARA | gene fusion |
| 2841 | 51                | 16.92                        | 24.40                             | PML-RARA | gene fusion |
| 2897 | 50                | 13.15                        | 47.51                             | PML-RARA | gene fusion |
