# Supplementary material for: Epigenetic Aging Signatures Are Coherently Modified in Cancer
Source: PubMed Central journal article supplement (PMC4482318; doi:10.1371/journal.pgen.1005334), 2015-06-25
Supplement: pgen.1005334.s014.pdf [file pgen.1005334.s014.pdf]

**S4 Table. Correlation of age-predictions using 99 CpG model and Horvath-predictor for different cancer types.**

| <b>Tumor type</b>              | <b>short cut</b> | <b><math>R^2</math></b> |
|--------------------------------|------------------|-------------------------|
| Adrenocortical carcinoma       | ACC              | 0.56                    |
| Bladder Urothelial Carcinoma   | BLCA             | 0.49                    |
| Endocervical adenocarcinoma    | CESC             | 0.59                    |
| Colon adenocarcinoma           | COAD             | 0.58                    |
| Esophageal carcinoma           | ESCA             | 0.61                    |
| Glioblastoma multiforme        | GBM              | 0.71                    |
| Head and Neck squamous cell CA | HNSC             | 0.51                    |
| Kidney chromophobe             | KICH             | 0.74                    |
| Renal clear cell carcinoma     | KIRC             | 0.71                    |
| Kidney renal papillary cell CA | KIRP             | 0.57                    |
| Acute myeloide leukemia        | LAML             | 0.71                    |
| Lower grade glioma             | LGG              | 0.65                    |
| Liver hepatocellular carcinoma | LIHC             | 0.50                    |
| Lung adenocarcinoma            | LUAD             | 0.74                    |
| Lung squamous cell carcinoma   | LUSC             | 0.56                    |
| Pancreatic adenocarcinoma      | PAAD             | 0.67                    |
| Pheochromocyt. & paraganglioma | PCPG             | 0.49                    |
| Prostate adenocarcinoma        | PRAD             | 0.40                    |
| Rectum adenocarcinoma          | READ             | 0.30                    |
| Sarcoma                        | SARC             | 0.58                    |
| Skin cutaneous melanoma        | SKCM             | 0.64                    |
| Stomach adenocarcinoma         | STAD             | 0.61                    |
| Thyroid carcinoma              | THCA             | 0.56                    |
| Uterine corpus endometrial CA  | UCEC             | 0.51                    |
| Uterine carcinosarcoma         | UCS              | 0.55                    |
