# Supplementary material for: Epigenetic Aging Signatures Are Coherently Modified in Cancer
Source: PubMed Central journal article supplement (PMC4482318; doi:10.1371/journal.pgen.1005334), 2015-06-25
Supplement: pgen.1005334.s015.pdf [file pgen.1005334.s015.pdf]

**S5 Table. Correlation of age-associated CpGs with chronological and predicted age for different cancer types.**

| Tumor Type                     | Short cut | CpGs with age-associated hypermethylation in control tissue |                                                     |                                                 |                       | CpGs with age-associated hypomethylation in control tissue |                                                     |                                                 |                       |
|--------------------------------|-----------|-------------------------------------------------------------|-----------------------------------------------------|-------------------------------------------------|-----------------------|------------------------------------------------------------|-----------------------------------------------------|-------------------------------------------------|-----------------------|
|                                |           | Number of CpGs ( $p > 0.05$ )                               | median corr. with chronological age in tumor tissue | median corr. with predicted age in tumor tissue | p value (wilcox test) | Number of CpGs ( $p < -0.05$ )                             | median corr. with chronological age in tumor tissue | median corr. with predicted age in tumor tissue | p value (wilcox test) |
| Renal clear cell carcinoma     | KIRC      | 1097                                                        | 0.18                                                | 0.32                                            | 3.4E-174              | 3                                                          | -0.11                                               | -0.06                                           | 0.70                  |
| Kidney renal papillary cell CA | KIRP      | 5464                                                        | 0.06                                                | 0.27                                            | 0                     | 2134                                                       | 0.02                                                | 0.03                                            | 0.47                  |
| Thyroid carcinoma              | THCA      | 1692                                                        | 0.25                                                | 0.26                                            | 0.69                  | 481                                                        | -0.03                                               | -0.03                                           | 0.99                  |
| Lung adenocarcinoma            | LUAD      | 2603                                                        | 0.04                                                | 0.22                                            | 6.0E-294              | 6380                                                       | 0.01                                                | 0.11                                            | 0                     |
| Liver hepatocellular carcinoma | LIHC      | 1362                                                        | 0.05                                                | 0.20                                            | 3.7E-121              | 150                                                        | -0.12                                               | 0.03                                            | 7.4E-28               |
| Bladder Urothelial Carcinoma   | BLCA      | 6540                                                        | 0.01                                                | 0.17                                            | 0                     | 3194                                                       | -0.04                                               | 0.07                                            | 2.2E-239              |
| Lung squamous cell carcinoma   | LUSC      | 938                                                         | 0.00                                                | 0.13                                            | 8.1E-25               | 266                                                        | -0.07                                               | -0.07                                           | 0.69                  |
| Esophageal carcinoma           | ESCA      | 16579                                                       | 0.02                                                | 0.11                                            | 0                     | 6512                                                       | 0.01                                                | 0.07                                            | 3.7E-108              |
| Pancreatic adenocarcinoma      | PRAD      | 31                                                          | 0.08                                                | 0.10                                            | 0.72                  | 12                                                         | -0.03                                               | -0.03                                           | 0.48                  |
| Head and Neck squamous CA      | HNSC      | 15                                                          | 0.06                                                | 0.05                                            | 1                     | 148                                                        | 0.00                                                | -0.02                                           | 3.7E-07               |
| Colon adenocarcinoma           | COAD      | 16318                                                       | 0.18                                                | 0.05                                            | 0                     | 3755                                                       | -0.04                                               | 0.12                                            | 0                     |
| Uterine corpus endometrial CA  | UCEC      | 982                                                         | 0.02                                                | 0.02                                            | 0.03                  | 158                                                        | -0.04                                               | 0.00                                            | 1.4E-06               |
