# Supplementary material for: Epigenetic Aging Signatures Are Coherently Modified in Cancer
Source: PubMed Central journal article supplement (PMC4482318; doi:10.1371/journal.pgen.1005334), 2015-06-25
Supplement: pgen.1005334.s016.pdf [file pgen.1005334.s016.pdf]

**S6 Table. Multivariate Cox regression model for ESCA ( $p$  value = 0.135).**

| <b>Parameters</b>    | <b>coef</b> | <b>exp(coef)</b> | <b>se(coef)</b> | <b>p value</b> |
|----------------------|-------------|------------------|-----------------|----------------|
| Chronological age    | 0.0179      | 1.018            | 0.0151          | 0.24           |
| Predicted Age        | -0.0303     | 0.97             | 0.0132          | 0.021          |
| Gender               | 0.1448      | 1.156            | 0.4557          | 0.75           |
| Smoking              | 0.5288      | 1.697            | 0.4025          | 0.19           |
| Histologic diagnosis | 0.2628      | 1.301            | 0.375           | 0.48           |
| Tumor grade          | -0.025      | 0.975            | 0.1959          | 0.9            |
